# Supplementary material for: Serum PBDEs exposure and influence factors in blood donors of Wuxi adults from 2013 to 2016
Source: Research Square preprint supplement (doi:10.21203/rs.3.rs-2274407/v1), 2023-01-13
Supplement: Supplementary file 1 [file 1ed2402cdd996b36fed5417c.docx]

**Serum PBDEs exposure and influence factors in blood donors of Wuxi adults from 2013 to 2016**

Limei Chen1,2#, Qitao Yin3#，Lu Xu4, Minyu Hua4, Zhen Zhang4, Yuqian Xu4, Wei Xia4, Huizhong Qian4, Jun Hong4, Jun Jin5

1. Department of Environmental Health, The Affiliated Wuxi Center for Disease Control and Prevention of Nanjing Medical University, Wuxi Center for Disease Control and Prevention, Wuxi, China.
2. Research Base for Environment and Health in Wuxi, Chinese Center for Disease Control and Prevention, Wuxi 214023, China
3. Wuxi Maternal and Child Health Care Hospital, No. 48, Huaishu Lane, 214002 Wuxi, China.
4. Wuxi Blood Center, Wuxi 214021, China
5. College of Life and Environment Sciences, Minzu University of China, Beijing 100081, China

# Corresponding author:

Limei Chen, Email: chenlimei919@163.com

Qitao Yin, Email: yqt1209@163.com

Summary

Three pages, including 13 Tables.

Table S1 Lipid-adjusted PBDE concentrations of the serum samples in 2013 (n= 33).

Table S2 Lipid-adjusted PBDE concentrations of the serum samples in 2014 (n= 33).

Table S3 Lipid-adjusted PBDE concentrations of the serum samples in 2015 (n= 33).

Table S4 Lipid-adjusted PBDE concentrations of the serum samples in 2016 (n= 33).

Table S5 Comparison of BDE-28 by collection period using Wilcoxon signed-rank test, bold indicates significance.

Table S6 Comparison of BDE-47 by collection period using Wilcoxon signed-rank test, bold indicates significance.

Table S7 Comparison of BDE-66 by collection period using Wilcoxon signed-rank test, bold indicates significance.

Table S8 Comparison of BDE-99 by collection period using Wilcoxon signed-rank test, bold indicates significance.

Table S9 Comparison of BDE-100 by collection period using Wilcoxon signed-rank test, bold indicates significance.

Table S10 Comparison of BDE-153 by collection period using Wilcoxon signed-rank test, bold indicates significance.

Table S11 Comparison of BDE-154 by collection period using Wilcoxon signed-rank test, bold indicates significance.

Table S12 Comparison of BDE-183 by collection period using Wilcoxon signed-rank test, bold indicates significance.

Table S13 Comparison of BDE-190 by collection period using Wilcoxon signed-rank test, bold indicates significance.

**Table S1.** Lipid-adjusted PBDE concentrations of the serum samples in 2013 (n= 33).

| PBDE congener | Detection  n (%) | Range | Selected percentiles (ng/g of Lipid) | | | |
| --- | --- | --- | --- | --- | --- | --- |
| 25th | 50th | 75th | 95th |
| BDE-28 | 33 (100) | 1.57 – 32.41 | 4.55 | 5.24 | 7.83 | 21.35 |
| BDE-47 | 29 (87.88) | ﹤LOD – 5.76 | 0.50 | 0.94 | 1.48 | 5.63 |
| BDE-66 | 33 (100) | 0.35 – 7.99 | 2.21 | 3.42 | 4.62 | 6.80 |
| BDE-99 | 33 (100) | 2.14 – 55.44 | 2.86 | 3.85 | 6.83 | 42.26 |
| BDE-100 | 33 (100) | 0.73 – 7.69 | 2.12 | 3.17 | 4.49 | 7.58 |
| BDE-153 | 27(81.82) | ﹤LOD – 8.14 | 1.07 | 1.62 | 3.89 | 7.82 |
| BDE-154 | 32(96.97) | ﹤LOD – 8.30 | 0.95 | 1.51 | 2.37 | 7.46 |
| BDE-183 | 32(96.97) | ﹤LOD – 14.18 | 1.83 | 2.93 | 6.34 | 11.81 |
| BDE190 | 33(100) | 2.16 – 17.23 | 4.20 | 6.17 | 9.87 | 16.09 |
| ∑9PBDEs | NA | 12.89– 100.06 | 21.99 | 33.46 | 50.21 | 94.74 |

∑9PBDEs: an aggregate variable generated by eight congeners

LOD: limit of detection

NA: not available

**Table S2.** Lipid-adjusted PBDE concentrations of the serum samples in 2014 (n= 33).

| PBDE congener | Detection  n (%) | Range | Selected percentiles (ng/g of Lipid) | | | |
| --- | --- | --- | --- | --- | --- | --- |
| 25th | 50th | 75th | 95th |
| BDE-28 | 33 (100) | 1.50 – 14.77 | 3.21 | 4.08 | 6.56 | 12.38 |
| BDE-47 | 29 (87.88) | ﹤LOD – 7.00 | 0.36 | 0.76 | 1.43 | 4.54 |
| BDE-66 | 33 (100) | 0.82 – 7.82 | 2.06 | 2.79 | 3.625 | 7.13 |
| BDE-99 | 33 (100) | 1.79 – 26.75 | 2.86 | 3.84 | 5.42 | 23.40 |
| BDE-100 | 33 (100) | 0.90 – 6.30 | 1.87 | 2.31 | 4.02 | 5.17 |
| BDE-153 | 24(72.72) | ﹤LOD – 7.85 | 0.46 | 1.48 | 3.59 | 6.67 |
| BDE-154 | 31(93.94) | ﹤LOD – 7.80 | 0.73 | 1.19 | 2.17 | 6.13 |
| BDE-183 | 32(96.97) | ﹤LOD – 10.98 | 1.46 | 2.50 | 6.36 | 10.74 |
| BDE190 | 33(100) | 2.21 – 13.52 | 3.35 | 4.84 | 8.24 | 13.51 |
| ∑9PBDEs | NA | 14.50– 58.74 | 24.12 | 29.75 | 38.68 | 57.46 |

∑9PBDEs: an aggregate variable generated by eight congeners

LOD: limit of detection

NA: not available

**Table S3.** Lipid-adjusted PBDE concentrations of the serum samples in 2015 (n= 33).

| PBDE congener | Detection  n (%) | Range | Selected percentiles (ng/g of Lipid) | | | |
| --- | --- | --- | --- | --- | --- | --- |
| 25th | 50th | 75th | 95th |
| BDE-28 | 33 (100) | 1.54 – 28.48 | 3.99 | 4.86 | 6.58 | 22.55 |
| BDE-47 | 29 (87.88) | ﹤LOD – 8.40 | 0.44 | 0.76 | 1.77 | 6.70 |
| BDE-66 | 33 (100) | 0.37 – 9.49 | 1.85 | 2.48 | 4.61 | 8.42 |
| BDE-99 | 33 (100) | 1.38 – 36.00 | 2.82 | 4.09 | 6.53 | 28.36 |
| BDE-100 | 33 (100) | 0.64 – 8.30 | 1.99 | 2.63 | 4.09 | 7.17 |
| BDE-153 | 32(96.97) | ﹤LOD – 7.83 | 0.71 | 1.45 | 2.90 | 6.30 |
| BDE-154 | 33(100) | 0.37 – 12.95 | 0.97 | 1.38 | 2.27 | 6.03 |
| BDE-183 | 32(96.97) | ﹤LOD – 15.83 | 1.80 | 3.08 | 4.99 | 12.61 |
| BDE190 | 33(100) | 1.60 – 14.55 | 3.97 | 5.64 | 9.50 | 14.39 |
| ∑9PBDEs | NA | 11.22– 105.77 | 22.23 | 30.85 | 46.39 | 78.51 |

∑9PBDEs: an aggregate variable generated by eight congeners

LOD: limit of detection

NA: not available

**Table S4.** Lipid-adjusted PBDE concentrations of the serum samples in 2016 (n= 33).

| PBDE congener | Detection  n (%) | Range | Selected percentiles (ng/g of Lipid) | | | |
| --- | --- | --- | --- | --- | --- | --- |
| 25th | 50th | 75th | 95th |
| BDE-28 | 33 (100) | 1.87 – 24.63 | 4.09 | 6.56 | 9.04 | 22.47 |
| BDE-47 | 29 (87.88) | ﹤LOD – 9.26 | 0.62 | 1.24 | 1.88 | 8.51 |
| BDE-66 | 33 (100) | 0.95 – 14.55 | 2.20 | 3.61 | 5.87 | 13.85 |
| BDE-99 | 33 (100) | 1.36 – 86.76 | 3.25 | 4.46 | 10.18 | 39.64 |
| BDE-100 | 33 (100) | 1.04 – 12.37 | 2.31 | 3.33 | 5.46 | 11.38 |
| BDE-153 | 32(96.97) | ﹤LOD – 9.23 | 0.46 | 1.74 | 5.19 | 8.42 |
| BDE-154 | 33(100) | 0.18 – 9.25 | 0.82 | 1.42 | 2.63 | 7.38 |
| BDE-183 | 32(96.97) | ﹤LOD – 15.47 | 1.73 | 2.52 | 7.91 | 11.65 |
| BDE190 | 33(100) | 2.45 – 20.33 | 4.14 | 6.34 | 11.31 | 20.00 |
| ∑9PBDEs | NA | 11.37– 172.10 | 24.87 | 35.02 | 52.49 | 121.99 |

∑9PBDEs: an aggregate variable generated by eight congeners

LOD: limit of detection

NA: not available

**Table S5** – Comparison of BDE-28 by collection period using Wilcoxon signed-rank test, bold indicates significance.

|  | 2014 | 2015 | 2016 |
| --- | --- | --- | --- |
| 2013 | **0.012** | 0.381 | 0.555 |
| 2014 |  | 0.448 | **0.013** |
| 2015 |  |  | 0.073 |

**Table S6** – Comparison of BDE-47 by collection period using Wilcoxon signed-rank test, bold indicates significance.

|  | 2014 | 2015 | 2016 |
| --- | --- | --- | --- |
| 2013 | 0.284 | 0.991 | 0.057 |
| 2014 |  | 0.489 | **0.031** |
| 2015 |  |  | 0.074 |

**Table S7** – Comparison of BDE-66 by collection period using Wilcoxon signed-rank test, bold indicates significance.

|  | 2014 | 2015 | 2016 |
| --- | --- | --- | --- |
| 2013 | 0.037 | 0.720 | 0.083 |
| 2014 |  | 0.406 | **0.009** |
| 2015 |  |  | **0.020** |

**Table S8** – Comparison of BDE-99 by collection period using Wilcoxon signed-rank test, bold indicates significance.

|  | 2014 | 2015 | 2016 |
| --- | --- | --- | --- |
| 2013 | **0.011** | 0.514 | 0.257 |
| 2014 |  | 0.386 | **0.048** |
| 2015 |  |  | 0.086 |

**Table S9** – Comparison of BDE-100 by collection period using Wilcoxon signed-rank test, bold indicates significance.

|  | 2014 | 2015 | 2016 |
| --- | --- | --- | --- |
| 2013 | **0.014** | 0.362 | 0.140 |
| 2014 |  | 0.623 | **0.006** |
| 2015 |  |  | **0.012** |

**Table S10** – Comparison of BDE-153 by collection period using Wilcoxon signed-rank test, bold indicates significance.

|  | 2014 | 2015 | 2016 |
| --- | --- | --- | --- |
| 2013 | 0.261 | 0.245 | 0.405 |
| 2014 |  | 0.819 | 0.121 |
| 2015 |  |  | 0.070 |

**Table S11** – Comparison of BDE-154 by collection period using Wilcoxon signed-rank test, bold indicates significance.

|  | 2014 | 2015 | 2016 |
| --- | --- | --- | --- |
| 2013 | **0.025** | 0.386 | 0.633 |
| 2014 |  | 0.580 | 0.178 |
| 2015 |  |  | 0.391 |

**Table S12** – Comparison of BDE-183 by collection period using Wilcoxon signed-rank test, bold indicates significance.

|  | 2014 | 2015 | 2016 |
| --- | --- | --- | --- |
| 2013 | 0.280 | 0.526 | 0.330 |
| 2014 |  | 0.802 | 0.093 |
| 2015 |  |  | 0.073 |

**Table S13** – Comparison of BDE-190 by collection period using Wilcoxon signed-rank test, bold indicates significance.

|  | 2014 | 2015 | 2016 |
| --- | --- | --- | --- |
| 2013 | **0.021** | 0.242 | 0.714 |
| 2014 |  | 0.183 | **0.007** |
| 2015 |  |  | **0.049** |
