# Supplementary material for: Serum PBDEs exposure and influence factors in blood donors of Wuxi adults from 2013 to 2016
Source: Research Square preprint supplement (doi:10.21203/rs.3.rs-2274407/v1), 2023-01-13
Supplement: Supplementary file 2 [file 9e764e6cad1336e7458eb6ef.docx]

**Table 1.** Demographic characteristics of the study population in 2016, Wuxi, China (n = 33).

| **Variable** | **No.** | **Mean ± SD or %** |
| --- | --- | --- |
| Age (years) a | 33 | 43.18 **±** 8.48 |
| ≤30 | 3 | 9.1% |
| 31-45 | 12 | 36.36% |
| ＞45 | 18 | 54.54% |
| Education (years) | | |
| < 9 | 8 | 24.20 |
| ≥ 9 | 25 | 76.80 |
| BMI (kg/m2) | 33 | 24.69 **±** 3.21 |
| < 18.5 | 9 | 27.30 |
| 18.5-23 | 24 | 72.70 |
| ≥ 23 | 0 | 0 |
| Household monthly income (¥) | | |
| ≤10000 | 27 | 81.80 |
| 10000-20000 | 5 | 15.20 |
| > 20000 | 1 | 3.00 |
| Sex | | |
| Males | 17 | 54.50 |
| Females | 16 | 45.50 |

a: The age results are analyzed based on 2016 data from questionnaires.

**Table 2**. Concentration [median (range) ng/g lipid] of selected PBDEs in archived serum samples from Wuxi from 2013 to 2016 (n = 33).

| PBDE congener | 2013 | 2014 | 2015 | 2016 |
| --- | --- | --- | --- | --- |
| Median (Range) | Median (Range) | Median (Range) | Median (Range) |
| BDE-28 | 5.24 (1.57–32.41) | 4.08 (1.50–14.77) | 4.86 (1.54–28.48) | 6.56 (1.87–24.63) |
| BDE-47 | 0.94 (﹤LOD – 5.76) | 0.76 (﹤LOD – 7.00) | 0.76 (﹤LOD – 8.40) | 1.24 (﹤LOD – 9.26) |
| BDE-66 | 3.42 (0.35–7.99) | 2.79 (0.82–7.82) | 2.48 (0.37–9.49) | 3.61 (0.95–14.55) |
| BDE-99 | 3.85 (2.14–55.44) | 3.84 (1.79–26.75) | 4.09 (1.38–36.00) | 4.46 (1.36–86.76) |
| BDE-100 | 3.17 (0.73–7.69) | 2.31 (0.90–6.30) | 2.63 (0.64–8.30) | 3.33 (1.04–12.37) |
| BDE-153 | 1.62 (﹤LOD – 8.14) | 1.48 (﹤LOD – 7.85) | 1.45 (﹤LOD – 7.83) | 1.74 (﹤LOD – 9.23) |
| BDE-154 | 1.51 (﹤LOD – 8.30) | 1.19 (﹤LOD – 7.80) | 1.38 (0.37–12.95) | 1.42 (0.18–9.25) |
| BDE-183 | 2.93 (﹤LOD – 14.18) | 2.50 (﹤LOD – 10.98) | 3.08 (﹤LOD – 15.83) | 2.52 (﹤LOD – 15.47) |
| BDE-190 | 6.17 (2.16–17.23) | 4.84 (2.21–13.52) | 5.64 (1.60–14.55) | 6.34 (2.45–20.33) |
| ∑9PBDEs | 33.46 (12.89–100.06) | 29.75 (14.50–58.74) | 30.85 (11.22–105.77) | 35.02 (11.37–172.10) |

∑9PBDEs: an aggregate variable generated by nine congeners

LOD: limit of detection

NA: not available

**Table 3**. Comparison of the concentration of each PBDE congener between male and female donors in different years (n=33) *.

|  | BDE-28 | BDE-47 | BDE-66 | BDE-99 | BDE-100 | BDE-153 | BDE-154 | BDE-183 | BDE-190 | ∑9PBDEs |
| --- | --- | --- | --- | --- | --- | --- | --- | --- | --- | --- |
| 2013 | | | | | | | | | | |
| Male | 5.26 | 0.88 | 4.04 | 3.92 | 3.75 | 2.87 | 1.79 | 4.87 | 8.32 | 42.98 |
| Female | 5.06 | 0.97 | 2.26 | 3.83 | 2.54 | 1.32 | 1.13 | 2.20 | 4.97 | 26.54 |
| *p* value | 0.828 | 1.000 | **0.027#** | 0.600 | 0.055 | **0.034** | 0.051 | **0.007** | **0.017** | **0.009** |
| 2014 | | | | | | | | | | |
| Male | 3.68 | 0.66 | 2.89 | 3.75 | 2.84 | 2.50 | 1.18 | 4.25 | 5.43 | 35.81 |
| Female | 4.14 | 0.77 | 2.20 | 3.95 | 1.93 | 1.17 | 1.19 | 2.18 | 4.69 | 25.04 |
| *p* value | 0.329 | 0.717 | 0.270 | 0.772 | 0.058 | 0.119 | 0.651 | 0.083 | 0.395 | 0.089 |
| 2015 | | | | | | | | | | |
| Male | 4.68 | 0.74 | 2.50 | 4.13 | 2.85 | 2.09 | 1.98 | 3.77 | 5.80 | 32.41 |
| Female | 5.02 | 0.80 | 2.45 | 3.72 | 2.54 | 1.15 | 1.33 | 2.25 | 5.56 | 30.12 |
| *p* value | 0.691 | 0.758 | 0.638 | 0.842 | 0.255 | 0.077 | 0.104 | 0.089 | 0.588 | 0.347 |
| 2016 | | | | | | | | | | |
| Male | 7.59 | 1.42 | 5.35 | 4.89 | 4.77 | 4.22 | 2.36 | 6.20 | 10.19 | 50.70 |
| Female | 5.26 | 1.04 | 2.78 | 3.81 | 2.52 | 1.05 | 1.18 | 2.33 | 4.49 | 27.95 |
| *p* value | **0.033** | 0.103 | **0.008** | 0.169 | **0.006** | **0.017** | 0.124 | **0.026** | **0.014** | **0.001** |

*: Mann-Whiney U test, 2-tailed.

#: bold indicates significance.

**Table 4**. Correlation between dietary intake and serum PBDEs of blood donors in 2016 *.

| Food | | BDE-28 | BDE-47 | BDE-66 | BDE-99 | BDE-100 | BDE-153 | BDE-154 | BDE-183 | BDE-190 | ∑9PBDE |
| --- | --- | --- | --- | --- | --- | --- | --- | --- | --- | --- | --- |
| Egg | r | 0.026 | 0.055 | 0.261 | 0.064 | 0.390 | 0.330 | 0.345 | 0.303 | 0.212 | 0.296 |
| *p* | 0.887 | 0.762 | 0.143 | 0.722 | **0.025#** | 0.061 | 0.050 | 0.087 | 0.236 | 0.094 |
| Fruits | r | -0.371 | -0.037 | -0.239 | -0.182 | -0.136 | -0.130 | -0.083 | 0.017 | -0.008 | -0.19 |
| *p* | **0.033** | 0.837 | 0.180 | 0.312 | 0.450 | 0.472 | 0.648 | 0.927 | 0.964 | 0.290 |
| Perch | r | -0.381 | 0.074 | 0.086 | -0.577 | 0.038 | 0.087 | -0.087 | -0.099 | 0.046 | -0.172 |
| *p* | **0.029** | 0.684 | 0.635 | **0.000** | 0.835 | 0.629 | 0.585 | 0.801 | 0.0854 | 0.338 |
| Catfish | r | 0.127 | 0.386 | 0.224 | -0.117 | 0.141 | 0.084 | 0.098 | 0.029 | 0.039 | 0.107 |
| *p* | 0.482 | **0.027** | 0.210 | 0.517 | 0.433 | 0.642 | 0.589 | 0.872 | 0.829 | 0.552 |
| Grass Carp | r | 0.037 | 0.187 | 0.382 | 0.233 | 0.352 | 0.324 | 0.181 | 0.355 | 0.360 | 0.313 |
| *p* | 0.838 | 0.298 | **0.028** | 0.193 | **0.045** | 0.066 | 0.314 | **0.043** | **0.039** | 0.076 |

*: Spearman rank correlation

#: bold indicates significance.
